# Supplementary material for: Tunable morphologies of indium tin oxide nanostructures using nanocellulose templates
Source: Royal Society of Chemistry journal article supplement (doi:10.1039/c5ra23054c), 2015-01-01
Supplement: c5ra23054c1.pdf [file c5ra23054c1.pdf]

## Supporting Information

# Tunable Morphologies of Indium Tin Oxide Nanostructures Using Nanocellulose Templates

*Yuan Lu<sup>§†</sup>, Joseph E. Poole II<sup>§†</sup>, Tolga Aytug<sup>‡</sup>, Harry M. Meyer III<sup>§</sup>, and Soydan Ozcan<sup>§\*</sup>*

<sup>†</sup>The authors have made equal contributions to the work.

<sup>\*</sup>Address correspondence to Dr. Soydan Ozcan, email: [ozcans@ornl.gov](mailto:ozcans@ornl.gov)

<sup>§</sup> Materials Science and Technology Division, Oak Ridge National Laboratory, 1 Bethel Valley Road, Oak Ridge, TN. 37831

<sup>‡</sup>Chemical Sciences Division, Oak Ridge National Laboratory, 1 Bethel Valley Road, Oak Ridge, TN. 37831

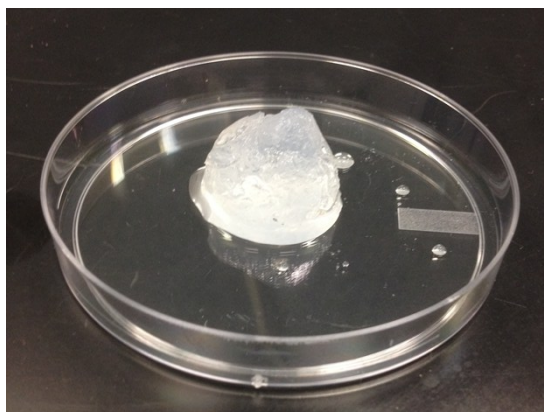

Figure S1. A hydrogel formed by cellulose nanofibrils and indium tin oxide precursors.

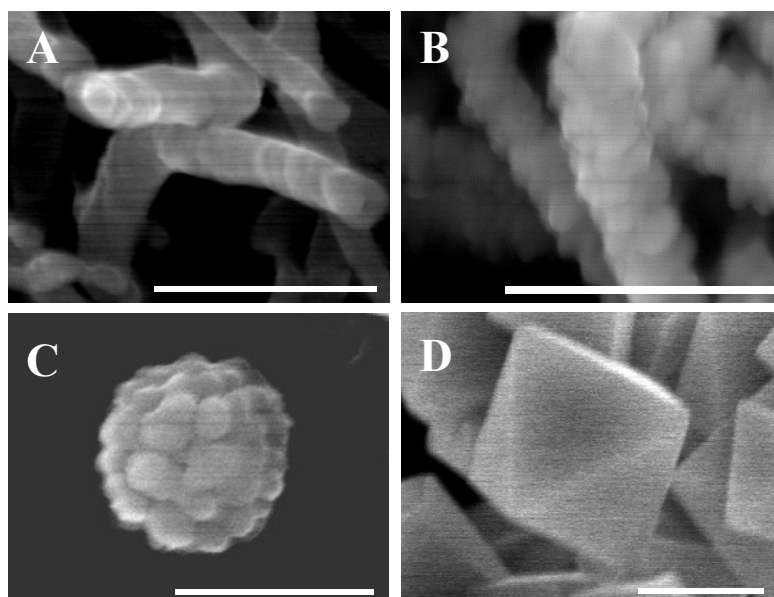

Figure S2. Scanning electron microscopy images of indium tin oxide (ITO) particles synthesized with a cellulose nanofibril : ITO precursor ratio of A, 1 : 5; B, 1 : 20; C, 1 : 30; and D, 1 : 80. Scale bar: 300 nm.

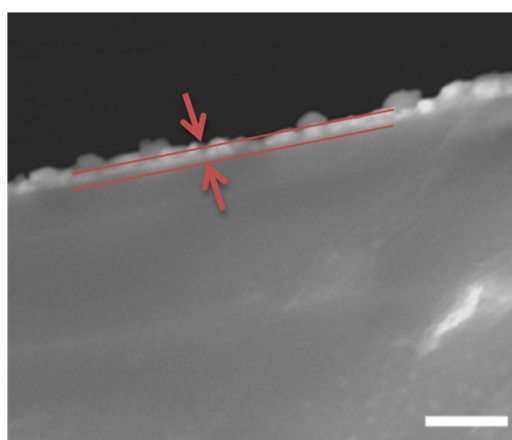

Figure S3. Scanning electron microscopy image showing the thickness of the sintered indium tin oxide coatings formed by octahedral nanoparticles. Scale bar: 1  $\mu$ m.

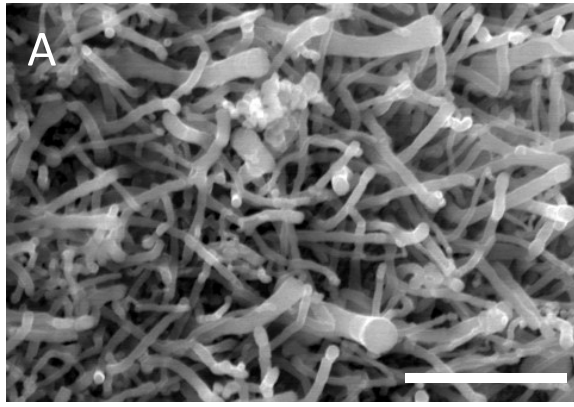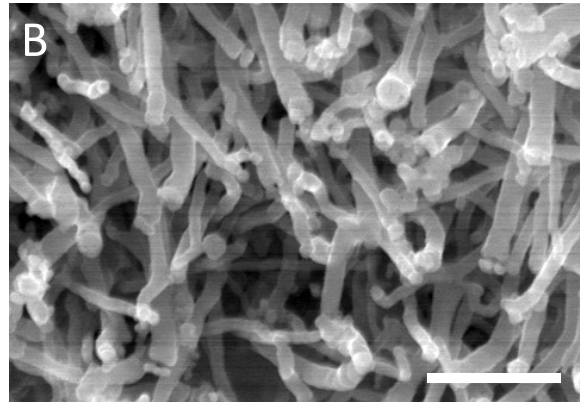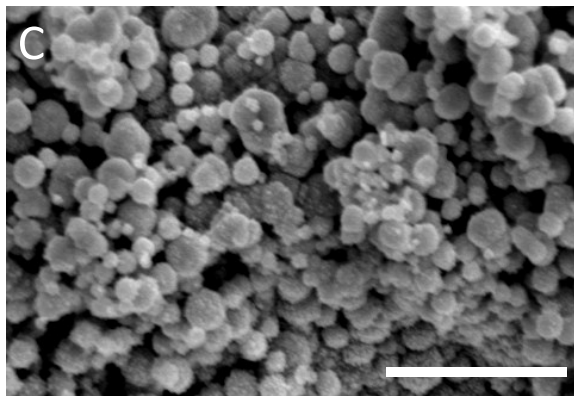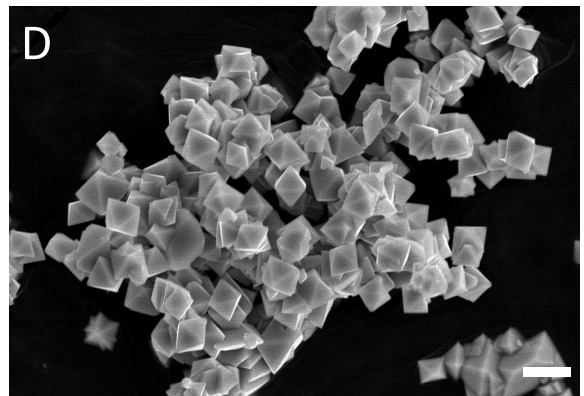

Figure S4. Scanning electron microscopy images of indium tin oxide (ITO) particles synthesized with a cellulose nanofibril : ITO precursor ratio of A, 1 : 5; B, 1 : 20; C, 1 : 30; and D, 1 : 80. Scale bar: 1000 nm.
